# Supplementary material for: Inter-rater reliability of functional MRI data quality control assessments: A standardised protocol and practical guide using pyfMRIqc
Source: Front Neurosci. 2023 Feb 3;17:1070413. doi: 10.3389/fnins.2023.1070413 (PMC9936142; doi:10.3389/fnins.2023.1070413)
Supplement: Supplementary file 1 [file Data_Sheet_1.XLSX]

## Sheet: Sheet1
Subject	rater1	rater2	rater3	rater4	Subject	rater1	rater2	rater3	rater4	Subject	rater1	rater2	rater3	rater4	Subject	rater1	rater2	rater3	rater4	Subject	rater1	rater2	rater3	rater4	Subject	rater1	rater2	rater3	rater4
sub-001	1	1	1	1	sub-101	1	1	1	1	sub-201	1	1	1	1	sub-301	1	1	1	1	sub-401	1	1	1	1	sub-701	1	1	1	1
sub-002	1	1	1	1	sub-102	1	1	1	1	sub-202	1	1	1	1	sub-302	1	1	1	1	sub-402	1	1	1	1	sub-702	1	1	1	1
sub-003	1	1	1	1	sub-103	1	1	1	1	sub-203	1	1	1	1	sub-303	1	1	1	1	sub-403	1	1	1	1	sub-703	1	1	1	1
sub-004	1	1	1	1	sub-104	1	1	1	1	sub-204	1	1	1	1	sub-304	1	1	1	1	sub-404	1	1	1	1	sub-704	1	1	1	1
sub-005	1	1	1	1	sub-105	1	1	1		sub-205	1	1	1		sub-305	1	1	1		sub-405	1	1	1	1	sub-705	1	1	1
sub-006	1	1	1	1	sub-106	1	1	1		sub-206	1	1	1		sub-306	1	1	1		sub-406	1	1	1	1	sub-706	1	1	1
sub-007	1	1	1		sub-107	1	1	1		sub-207	1	1	1		sub-307	1	1	1		sub-407	1	1	1	1	sub-707	1	1	1
sub-008	1	1	1		sub-108	1	1	1		sub-208	1	1	1		sub-308	1	1		1	sub-408	1	1	1		sub-708	1	1	1
sub-009	1	1	1		sub-109	1	1		1	sub-209	1	1		1	sub-309	1	1		1	sub-409	1	1	1		sub-709	1	1		1
sub-010	1	1	1		sub-110	1	1		1	sub-210	1	1		1	sub-310	1	1		1	sub-410	1	1	1		sub-710	1	1		1
sub-011	1	1	1		sub-111	1	1		1	sub-211	1	1		1	sub-311	1		1	1	sub-411	1	1	1		sub-711	1	1		1
sub-012	1	1	1		sub-112	1	1		1	sub-212	1	1		1	sub-312	1		1	1	sub-412	1	1		1	sub-712	1	1		1
sub-013	1	1		1	sub-113	1		1	1	sub-213	1		1	1	sub-313	1		1	1	sub-413	1	1		1	sub-713	1		1	1
sub-014	1	1		1	sub-114	1		1	1	sub-214	1		1	1	sub-314		1	1	1	sub-414	1	1		1	sub-714	1		1	1
sub-015	1	1		1	sub-115	1		1	1	sub-215	1		1	1	sub-315		1	1	1	sub-415	1	1		1	sub-715	1		1	1
sub-016	1	1		1	sub-116	1		1	1	sub-216	1		1	1	sub-316		1	1	1	sub-416	1		1	1	sub-716	1		1	1
sub-017	1	1		1	sub-117		1	1	1	sub-217		1	1	1						sub-417	1		1	1	sub-717		1	1	1
sub-018	1	1		1	sub-118		1	1	1	sub-218		1	1	1						sub-418	1		1	1	sub-718		1	1	1
sub-019	1		1	1	sub-119		1	1	1	sub-219		1	1	1						sub-419	1		1	1	sub-719		1	1	1
sub-020	1		1	1	sub-120		1	1	1	sub-220		1	1	1						sub-420		1	1	1	sub-720		1	1	1
sub-021	1		1	1																sub-421		1	1	1
sub-022	1		1	1																sub-422		1	1	1
sub-023	1		1	1																sub-423		1	1	1
sub-024	1		1	1
sub-025		1	1	1
sub-026		1	1	1
sub-027		1	1	1
sub-028		1	1	1
sub-029		1	1	1
sub-030		1	1	1
