# Supplementary material for: Inter-rater reliability of functional MRI data quality control assessments: A standardised protocol and practical guide using pyfMRIqc
Source: Front Neurosci. 2023 Feb 3;17:1070413. doi: 10.3389/fnins.2023.1070413 (PMC9936142; doi:10.3389/fnins.2023.1070413)
Supplement: Supplementary file 2 [file Data_Sheet_2.XLSX]

## Sheet: Sheet1
Subject	Raters excluded	Abnormal brain morphology	Aliasing	Global signal	Incorrect acquisition parameters	Motion	Non-whole brain coverage	Ringing artefact	SNR	Unidentified artefact	Wraparound artefact
sub-003	4/4					4/4
sub-009	2/3					2/3
sub-011	1/3								1/3
sub-012	3/3					3/3
sub-013	3/3			1/3		3/3
sub-017	3/3					3/3
sub-018	3/3					3/3
sub-020	1/3								1/3
sub-021	1/3		1/3			1/3			1/3
sub-022	3/3			1/3		3/3			1/3
sub-023	1/3			1/3		1/3					1/3
sub-024	3/3			2/3		3/3			2/3
sub-026	3/3					3/3
sub-027	3/3					3/3
sub-029	3/3					3/3
sub-102	3/4					4/4
sub-105	3/3					3/3
sub-106	1/3			1/3		1/3
sub-107	3/3					3/3
sub-114	1/3				1/3
sub-115	3/3				1/3	2/3
sub-118	3/3				1/3	3/3
sub-119	1/3					1/3
sub-203	1/4	1/4			1/4
sub-207	3/3					3/3
sub-208	1/3			1/3		1/3
sub-305	1/3						1/3
sub-314	2/3		2/3	1/3		1/3
sub-409	2/3			1/3		1/3
sub-415	2/3		2/3
sub-703	2/3					2/3		1/3
sub-706	3/3					3/3
sub-709	1/3			1/3
sub-710	1/3									1/3
sub-711	1/3			1/3						1/3
sub-712	2/3					1/3				1/3
sub-714	3/3					3/3
sub-715	1/3					1/3
sub-716	2/3			1/3		2/3
sub-718	1/3									1/3
sub-719	2/3	1/3							1/3
